# Supplementary material for: Vibrations on mastoid process alter the gait characteristics during walking on different inclines
Source: PeerJ. 2023 Mar 23;11:e15111. doi: 10.7717/peerj.15111 (PMC10040183; doi:10.7717/peerj.15111)
Supplement: Supplemental Information 1 — The data include Stand Time, Double Support Time, Step Length, Step Time, Step Width, Foot clearance and respective variability. [file peerj-11-15111-s001.xlsx]

## Sheet: Stand Time
	% of GaitCycle
	No_0	No_3	No_6	No_9	V_0	V_3	V_6	V_9
Sub01	64.0066	63.6871	63.3813	62.8618	63.6311	64.2833	63.5521	63.5463
Sub02	62.8638	63.541	63.5625	63.6311	63.6938	63.3907	64.2722	62.6282
Sub03	64.5713	65.0684	64.8847	64.9116	64.228	65.1829	65.2002	65.257
Sub04	66.2351	65.6223	65.263	65.0139	66.1098	66.3043	65.0995	65.2793
Sub05	66.4432	65.6811	66.5409	66.2384	66.7286	66.5245	67.2042	66.3324
Sub06	63.2782	63.0082	63.3619	63.1581	63.2591	62.8791	62.7217	62.4475
Sub07	63.7807	63.5358	64.057	64.0422	63.827	63.5491	63.4545	63.7583
Sub08	64.7056	64.5608	64.735	64.6829	64.5311	64.5612	64.3606	64.3988
Sub09	62.935	63.6685	63.5846	63.5583	63.137	63.5422	62.2158	62.4593
Sub10	62.9694	62.7411	63.3214	63.159	63.0072	63.3143	63.1324	63.1715
Sub11	63.3125	63.2265	63.214	63.4695	63.2205	63.2527	63.1167	62.8645
Sub12	63.5492	63.6432	63.1726	63.472	63.1501	63.1173	62.9203	62.7612
Sub13	62.1388	62.0696	62.3347	62.5589	62.3155	62.1308	62.5184	62.5484
Sub14	62.604	62.5299	62.3846	62.9869	62.5458	62.0973	62.079	62.3616
Sub15	61.7524	61.7524	61.8089	62.111	61.9035	61.9183	61.6746	61.6312
Sub16	64.4553	64.1962	64.3364	64.3925	63.5556	64.3806	63.6378	63.6002
Sub17	63.144	63.0232	63.2816	63.2676	63.3091	63.3177	62.0227	62.9385
Sub18	62.6593	62.7237	63.2344	63.0139	63.4088	62.7907	63.1285	62.7473
Sub19	62.234	62.1108	62.2491	62.3117	62.2112	62.0924	61.8074	61.8437
avg	63.5599	63.4942	63.6162	63.6232	63.567	63.6121	63.3747	63.2934
std	1.27284	1.13313	1.15376	1.03891	1.20436	1.32552	1.38655	1.24005

## Sheet: Stand Time Variability
	% of GaitCycle
	No_0	No_3	No_6	No_9	V_0	V_3	V_6	V_9
Sub01	2.18595	2.32364	2.12279	1.72541	2.14897	2.32485	1.82827	2.41401
Sub02	1.72005	1.81837	2.44061	2.14897	2.37339	2.12474	2.34349	2.18595
Sub03	1.55928	1.78669	2.69726	2.35427	1.41965	1.50663	1.3759	1.54723
Sub04	2.34517	2.38699	2.57998	3.8161	2.41834	2.38111	3.7529	4.30738
Sub05	1.77461	1.69849	2.0001	2.0101	1.41067	1.76953	1.93287	2.28114
Sub06	1.52611	1.78461	1.50724	1.62742	1.75796	1.92153	1.9073	1.46723
Sub07	1.02398	0.848152	1.03694	0.926298	1.10835	1.2231	1.14581	1.06024
Sub08	1.13124	1.48636	1.39055	1.08511	1.54768	1.34692	1.77494	1.88665
Sub09	2.07096	1.65438	1.77041	1.58482	2.03932	1.80203	2.21785	1.78474
Sub10	1.37961	1.25606	1.73434	1.44955	1.57402	1.85642	1.59067	1.93059
Sub11	1.32992	1.46828	1.96869	1.67522	1.27043	2.03741	1.47495	1.37194
Sub12	1.3593	1.42687	1.42234	1.73771	1.68762	1.69356	1.69245	1.9047
Sub13	1.25804	1.18985	1.35798	1.21432	1.37858	1.37741	1.38661	1.22832
Sub14	1.25919	1.27744	1.48203	1.41928	1.8816	1.91138	1.66254	1.59333
Sub15	1.41766	1.41766	1.74753	1.59215	1.54587	1.55968	1.55687	1.45611
Sub16	2.05159	1.84948	1.71553	2.52291	1.86472	2.01317	1.94742	1.87322
Sub17	2.24256	1.85019	1.52963	2.19065	1.72279	2.55409	2.55469	1.98574
Sub18	1.38445	1.25312	1.39847	1.26133	1.52567	1.15923	1.80146	1.63754
Sub19	1.69564	1.52514	1.53154	1.36434	2.49364	1.36895	1.57199	1.42367
avg	1.61659	1.59483	1.75968	1.774	1.74575	1.78588	1.86942	1.85999
std	0.396999	0.377997	0.444836	0.654456	0.396781	0.400332	0.571735	0.69172

## Sheet: doubleSupportTime
	% of GaitCycle
	No_0	No_3	No_6	No_9	V_0	V_3	V_6	V_9
Sub01	26.0176	25.3831	24.7759	23.7192	25.2535	26.5885	25.1041	25.0971
Sub02	23.7189	25.0906	25.1162	25.2535	25.3919	24.7858	26.5703	26.0176
Sub03	27.1426	28.1412	27.7433	27.8361	26.4561	28.3745	28.4003	28.5097
Sub04	30.4659	29.2446	28.5479	28.0366	30.2196	30.6087	28.199	28.5717
Sub05	30.8863	29.3622	31.0818	30.4767	31.4704	31.0534	32.4085	30.6648
Sub06	24.552	24.0034	24.7282	24.3074	24.5268	23.7539	23.4391	22.8994
Sub07	25.5615	25.0716	26.114	26.0845	25.6541	25.1068	24.9091	25.5121
Sub08	27.4155	27.1216	27.47	27.3658	27.0666	27.1311	26.7212	26.8063
Sub09	23.8657	25.3458	25.1692	25.1166	24.2915	25.0756	22.4099	22.9273
Sub10	23.9476	23.4823	24.6559	24.3268	24.0276	24.6462	24.2781	24.3563
Sub11	24.6162	24.453	24.4456	24.939	24.441	24.501	24.2378	23.7289
Sub12	25.1028	25.2908	24.3539	24.9439	24.3002	24.2345	23.8449	23.5267
Sub13	22.2777	22.1217	22.6738	23.1177	22.6266	22.266	23.0457	23.0923
Sub14	23.2037	23.0555	22.7735	23.9695	23.0916	22.2078	22.158	22.7232
Sub15	21.5091	21.5091	21.6178	22.222	21.7983	21.8366	21.3406	21.2625
Sub16	26.8931	26.3968	26.6684	26.7807	25.1112	26.8005	25.2712	22.6117
Sub17	24.2837	24.042	24.5501	24.544	24.6139	24.6354	22.0454	23.8682
Sub18	23.3274	23.4428	24.4732	24.0146	24.8088	23.5814	24.2615	21.3215
Sub19	22.4549	22.213	22.4939	22.6015	22.4094	22.1671	21.6062	21.7062
avg	25.118	24.988	25.2343	25.2451	25.1347	25.2292	24.75	24.4844
std	2.54544	2.26918	2.30653	2.08131	2.41191	2.65437	2.77567	2.62204

## Sheet: doublesupportTime Variability
	% of GaitCycle
	No_0	No_3	No_6	No_9	V_0	V_3	V_6	V_9
Sub01	2.09997	2.0267	1.77248	1.44048	2.00337	2.02929	1.66639	1.75673
Sub02	1.43429	1.66409	1.77754	2.00337	2.04192	1.76946	2.0484	2.09997
Sub03	1.2211	1.23874	1.73057	1.48333	0.900822	0.937103	1.12539	1.03562
Sub04	2.19693	2.35102	2.47279	3.17543	2.06286	2.20044	3.74471	3.54455
Sub05	1.70746	1.49229	2.07252	1.78336	1.18686	1.32683	1.63632	1.52121
Sub06	1.19417	1.35866	1.11545	1.19688	1.22721	1.41337	1.22404	1.14461
Sub07	0.939087	0.940752	0.962973	0.980122	0.999367	1.14993	0.957169	0.964996
Sub08	0.91978	1.10742	1.1825	1.00605	1.35125	1.09896	1.33165	1.44009
Sub09	2.10091	1.32778	1.77411	1.51373	1.53988	1.64237	1.74969	1.86279
Sub10	1.22706	1.16803	1.4227	1.11322	1.17025	1.25695	1.23483	1.32188
Sub11	1.36912	1.43964	1.47452	1.52143	1.20529	1.72246	1.31903	1.40262
Sub12	1.2269	1.27534	1.31558	1.57405	1.68086	1.31584	1.42427	1.44585
Sub13	1.1994	1.09995	1.09098	0.981485	1.03799	1.0758	1.23098	0.932557
Sub14	1.11314	1.16224	1.15521	1.29101	1.64428	1.48576	1.36338	1.37791
Sub15	1.12653	1.12653	1.45281	1.40957	1.34221	1.35893	1.32253	1.37663
Sub16	1.49018	1.40729	1.32034	1.70065	1.21326	1.47237	1.28277	1.44944
Sub17	1.9276	1.76811	1.47595	1.6285	1.52676	2.19738	1.85911	1.5783
Sub18	1.28575	1.27132	1.3741	1.24972	1.29568	1.1145	1.33506	1.37004
Sub19	1.54113	1.60598	1.46934	1.20091	1.95695	1.28795	1.50004	1.17667
avg	1.43792	1.4122	1.49539	1.48701	1.44142	1.46609	1.54504	1.51592
std	0.392976	0.348718	0.370364	0.496253	0.367081	0.372881	0.595526	0.572104

## Sheet: StepLength
	step length (mm)
	No_0	No_3	No_6	No_9	V_0	V_3	V_6	V_9
Sub01	485.486	491.26	504.77	492.359	478.298	493.677	482.878	494.135
Sub02	492.249	483.015	494.385	478.298	491.562	504.955	493.613	485.486
Sub03	527.828	539.631	562.044	564.261	542.876	554.619	568.777	582.049
Sub04	521.393	527.311	543.837	545.144	531.017	532.398	543.785	549.524
Sub05	566.669	537.803	547.786	595.066	590.29	605.173	590.611	606.376
Sub06	511.298	530.512	514.729	507.701	512.29	517.921	512.426	524.707
Sub07	656.418	647.025	667.667	669.073	681.739	678.496	675.449	687.125
Sub08	600.067	602.834	618.594	622.297	636.463	636.739	646.359	653.476
Sub09	470.718	476.846	484.769	483.228	477.565	483.254	477.193	484.34
Sub10	536.358	531.747	553.066	546.452	554.05	555.219	564.09	539.56
Sub11	516.061	521.245	518.987	526.421	514.284	526.306	538.903	517.926
Sub12	479.34	479.804	477.493	477.268	477.716	487.131	469.647	484.359
Sub13	681.124	675.775	691.108	687.564	706.311	724.776	707.347	726.512
Sub14	541.125	542.448	555.319	551.384	553.639	560.667	548.27	554.123
Sub15	577.553	577.553	571.963	589.458	590.886	587.284	573.963	590.675
Sub16	497.427	506.336	519.153	515.714	523.388	524.522	531.239	526.885
Sub17	507.98	504.679	515.07	514.025	531.321	525.901	517.339	546.377
Sub18	537.706	529.862	541.06	547.44	566.94	539.103	559.408	565.292
Sub19	501.315	493.875	502.577	496.583	508.704	498.71	494.711	504.855
avg	537.269	536.819	546.546	547.881	551.018	554.571	552.421	559.146
std	57.2682	54.5604	57.8796	61.4456	65.7248	65.9417	65.8394	68.902

## Sheet: StepLength Variability
	step length variability (mm)
	No_0	No_3	No_6	No_9	V_0	V_3	V_6	V_9
Sub01	137.323	170.181	154.07	146.085	145.557	162.167	128.221	185.653
Sub02	145.498	128.443	186.17	145.557	171.306	153.981	162.045	137.323
Sub03	172.878	172.685	239.385	206.473	138.487	153.258	132.195	143.41
Sub04	217.525	209.131	216.835	260.573	197.451	230.381	244.429	295.31
Sub05	166.023	163.628	187.249	181.346	148.808	172.37	177.287	205.098
Sub06	122.371	175.455	124.499	128.764	139.377	150.285	157.57	125.082
Sub07	96.1098	84.5739	104.404	96.7633	107.782	107.729	114.621	104.471
Sub08	125.624	118.776	145.496	120.634	150.66	134.259	151.785	187.303
Sub09	115.411	100.421	105.876	86.6059	160.174	109.485	168.311	120.813
Sub10	122.678	101.293	145.103	129.931	153.34	170.735	201.258	160.635
Sub11	115.98	101.637	144.028	114.847	95.9074	143.712	106.671	95.4781
Sub12	100.609	104.762	101.159	121.914	116.502	118.965	112.744	128.109
Sub13	127.524	109.267	118.121	115.745	141.908	150.359	136.121	141.695
Sub14	109.581	105.261	123.362	117.202	165.775	156.146	154.485	146.641
Sub15	128.296	128.296	141.357	132.803	128.546	129.487	139.458	121.993
Sub16	167.518	147.947	127.346	209.8	187.538	153.661	169.622	162.598
Sub17	165.621	147.542	135.03	171.4	165.586	184.571	186.292	187.632
Sub18	103.892	101.369	101.891	103.656	119.717	101.415	152.129	156.232
Sub19	119.413	98.5161	95.4113	103.601	172.896	107.629	96.5562	104.881
avg	134.73	129.957	141.936	141.774	147.753	146.873	152.2	153.177
std	30.8352	34.7317	40.0746	45.1052	26.5514	31.5192	35.6938	46.2183

## Sheet: StepTime
	step time (ms)
	No_0	No_3	No_6	No_9	V_0	V_3	V_6	V_9
Sub01	725.063	724.167	742.434	718.797	711.543	729.487	708.188	722.564
Sub02	718.625	708.395	722.975	711.543	724.684	742.727	729.304	725.063
Sub03	628.207	638.333	663.046	664.713	641.067	657.386	672.326	689.405
Sub04	626.467	632.556	650.682	645.909	635.385	639.607	647.727	648.295
Sub05	704.375	668.588	673.452	740.987	727.949	750.667	726.667	748.224
Sub06	526.33	542.85	527.798	521.136	523	530.278	522.773	535.231
Sub07	621.196	610.957	628.352	631.389	639.775	636.833	632.333	645.455
Sub08	573	577.273	585.459	590.567	600.368	602.737	609.149	616.022
Sub09	565.743	572.25	577.828	574.85	566.634	572.1	565.49	574.65
Sub10	643.146	634.056	663.023	653.621	662.849	664.186	677.202	645.17
Sub11	600.316	606.474	600.842	608.404	594.124	608.138	621.902	598.684
Sub12	637.944	636.167	633.278	633.708	633.944	646.379	624.67	643.82
Sub13	564.951	562.5	569.158	566.436	581.173	589.897	579.337	594.323
Sub14	589.742	590.567	603.211	599.842	602.316	608.67	595.26	603.842
Sub15	598.073	598.073	590.155	608.043	607.553	603.684	592.423	606.613
Sub16	597.135	605.638	618.37	608.191	627.363	621.25	634	629.831
Sub17	586.173	580.859	592.423	592.135	609.894	607.287	594.531	629.945
Sub18	687.134	677.561	690.915	699.259	724.231	688.072	712.658	719.241
Sub19	572.05	564.412	574.75	567.129	582.602	570.202	563.824	576.793
avg	619.246	617.457	626.745	628.245	631.392	635.242	632.093	639.641
std	55.8053	49.9847	55.735	58.6092	57.4137	59.5278	59.3644	58.147

## Sheet: StepTime Variability
	step time variability (ms)
	No_0	No_3	No_6	No_9	V_0	V_3	V_6	V_9
Sub01	23.2611	27.6372	24.8704	22.4419	25.1102	27.2336	19.8381	27.0214
Sub02	22.3603	19.8727	27.0999	25.1102	27.8913	24.8991	27.2548	23.2611
Sub03	20.7652	20.2636	28.1496	24.9549	16.4157	18.5777	15.2311	17.0839
Sub04	21.1169	21.5366	22.2092	32.2361	19.795	23.2734	26.7786	35.0908
Sub05	21.5058	19.9201	23.1369	22.8372	17.5506	21.4778	21.9481	26.3974
Sub06	12.0797	16.439	12.7982	13.1753	15.113	15.4293	16.3591	12.9019
Sub07	9.90031	8.59911	10.7984	10.7154	10.7333	11.3095	11.291	10.5732
Sub08	10.6096	10.0575	13.2159	9.87949	13.3084	11.4958	14.9265	17.4999
Sub09	13.1464	11.7528	12.8178	10.4654	18.2997	12.7437	19.7086	13.3329
Sub10	15.5571	11.8979	18.2298	15.2851	18.2741	20.2883	24.2474	19.4488
Sub11	14.8682	13.4788	18.0337	15.4299	12.2371	17.5579	13.6374	12.9654
Sub12	13.7697	14.2317	13.6938	16.2176	15.696	16.2742	14.8157	17.1405
Sub13	10.9858	9.98151	11.4076	10.3264	12.451	13.2332	11.3711	12.3458
Sub14	12.1491	11.7481	13.7517	12.9907	17.5754	17.2691	16.9055	16.15
Sub15	13.2212	13.2212	15.7202	14.8021	13.4193	13.9198	15.263	13.2269
Sub16	19.4592	17.091	15.3841	23.5811	21.8652	18.615	20.4311	19.4115
Sub17	19.4844	17.0627	15.4654	19.7397	18.1199	22.5768	21.5812	20.984
Sub18	14.0011	14.6586	14.5617	14.6409	16.9644	13.0693	19.9176	21.4311
Sub19	13.7566	11.2362	12.0692	12.6047	19.9194	13.097	11.8732	12.7627
avg	15.8946	15.2993	17.0218	17.2334	17.4073	17.4916	18.0726	18.37
std	4.4047	4.88055	5.44253	6.31813	4.35351	4.75792	4.88819	6.27851

## Sheet: StepWidth
	step length (mm)
	No_0	No_3	No_6	No_9	V_0	V_3	V_6	V_9
Sub01	73.3554	73.7694	73.16	71.4353	75.8459	71.4188	71.9332	72.718
Sub02	71.5486	71.796	72.8717	73.1915	74.8861	73.0928	71.4342	73.3554
Sub03	141.92	146.096	158.471	152.969	134.977	140.394	143.696	142.855
Sub04	97.5098	86.9181	96.8663	94.9961	97.818	92.4734	98.8868	95.4472
Sub05	127.202	132.205	132.391	138.773	141.79	148.599	149.129	158.602
Sub06	64.2908	68.8133	67.1925	65.0957	67.027	64.1778	66.6417	67.9857
Sub07	120.362	123.346	123.195	122.485	123.761	130.659	130.483	123.336
Sub08	138.933	129.661	128.198	127.439	141.002	138.418	138.01	144.014
Sub09	90.9166	96.5018	92.7929	92.724	86.7014	87.7137	85.0209	85.4497
Sub10	75.4106	83.8958	72.8858	73.7921	78.1811	76.492	79.8321	87.1541
Sub11	108.4	108.21	112.363	112.177	103.649	111.361	114.879	104.779
Sub12	85.7469	87.0259	91.3261	71.1783	86.8425	84.5991	75.7154	91.3314
Sub13	57.8285	58.4862	51.6043	53.2273	52.2356	58.6578	52.3062	57.5147
Sub14	77.8421	74.3011	68.742	72.745	65.1759	73.8698	65.6073	72.9291
Sub15	66.4675	66.4675	56.5645	53.8248	59.8115	61.346	50.5665	63.4769
Sub16	82.774	85.7162	81.6857	99.0862	87.4605	95.5982	111.698	98.6521
Sub17	78.9815	80.6845	92.5397	82.8817	92.0016	93.0676	102.89	97.7806
Sub18	82.816	75.0701	75.9975	79.0246	88.2578	80.0995	84.4559	85.4215
Sub19	46.3365	50.9717	40.7223	38.7486	38.063	36.1261	36.2801	33.8121
avg	88.8759	89.4703	88.9248	88.1997	89.2362	90.4297	91.0245	92.4534
std	27.0242	26.5888	30.4734	30.7018	29.3108	30.7763	33.0611	31.7254

## Sheet: StepWidth Variability
	step length variability (mm)
	No_0	No_3	No_6	No_9	V_0	V_3	V_6	V_9
Sub01	16.467	16.333	15.8551	13.5038	16.5798	15.6067	16.141	17.7699
Sub02	11.8815	10.698	14.9463	13.4244	12.8711	13.1965	12.2421	12.0885
Sub03	18.8317	14.4669	22.0266	22.1054	21.8564	22.2209	22.467	21.3894
Sub04	12.1442	10.3082	14.5102	13.6452	14.2273	15.4801	15.1063	15.9685
Sub05	12.4732	11.1373	13.2824	13.4156	14.5615	12.8883	12.6726	13.1215
Sub06	16.1469	16.1469	17.2391	14.0463	14.2146	14.3314	15.8047	15.7905
Sub07	16.06	15.3863	17.2358	17.5364	16.3386	19.2457	16.9091	18.3321
Sub08	16.8304	15.0203	16.3727	15.7343	17.5201	14.6868	15.4213	15.4356
Sub09	11.8452	8.79717	12.8712	11.8994	14.8135	10.6036	13.3138	14.5471
Sub10	9.05135	7.91522	11.256	9.92453	9.91061	9.83367	10.4346	10.0853
Sub11	14.8997	17.5063	13.991	15.4562	12.3211	16.406	13.4541	14.5571
Sub12	15.4865	13.4701	14.5302	16.3593	13.168	13.913	16.3391	14.8997
Sub13	15.9806	18.6011	19.5474	21.1219	11.3424	15.8249	14.9231	14.152
Sub14	16.7272	21.0069	19.2902	22.3284	14.3267	17.4645	21.0518	24.7347
Sub15	21.0537	19.6954	19.9919	17.706	18.0182	18.082	22.5109	16.259
Sub16	15.563	13.9309	14.5549	14.651	16.9337	17.0452	17.5222	16.7561
Sub17	15.2464	11.4021	17.1667	14.751	18.0588	15.3034	16.8294	13.962
Sub18	13.0999	10.7388	18.335	14.6144	16.5305	14.6983	14.5034	14.0857
Sub19	12.9577	11.5028	13.898	12.376	12.5305	12.1349	13.7556	12.4725
avg	14.8814	13.8981	16.1527	15.5052	15.0591	15.2087	15.8633	15.6004
std	2.79839	3.71753	2.79852	3.38082	2.83301	2.94581	3.27295	3.3294

[truncated: 2 more sheets: FootClearance, FootClearance Variability]
